# Supplementary material for: Surgical vs. transcatheter aortic valve replacement in patients over 75 years with aortic stenosis: sociodemographic profile, clinical characteristics, quality of life and functionality
Source: PeerJ. 2023 Sep 20;11:e16102. doi: 10.7717/peerj.16102 (PMC10538279; doi:10.7717/peerj.16102)
Supplement: Supplemental Information 3 [file peerj-11-16102-s003.xlsx]

## Sheet: RAW
CENTER	PROCEDURE	GENDER	WEIGHT	HEIGHT	CIVIL STATUS	Who do you live with?	STUDIES	SMOKING	HBP	DM	DLP	PRIOR STROKE	TIA	Peripheral Arteriopathy	PRIOR MI	PRIOR PTCA	PRIOR CABG	PRIOR SAVR	Prior MVR	Other Prior Cardiac Surgery	Prior pacemaker	Prior ICD	PRIOR AF	PRIOR ANTICOAGULATION	PRIOR COPD	Anxiety-Depression Syndrome	Cognitive Impairment	Prior liver disease	SYMPTOMS	NYHA	PRIOR HB	PRIOR GF	PRIOR LVEF	NYHA BASELINE	SF36 GLOBAL BASELINE	Physical Function BASELINE	Physical Role BASELINE	Bodily Pain BASELINE	General Health BASELINE	Vitality BASELINE	Social Function BASELINE	Emotional Role BASELINE	Mental Health BASELINE	Health Transition BASELINE	EuroQol-5D GLOBAL BASELINE	Mobility BASELINE	Self care BASELINE	Usual Activites BASELINE	Pain/Discomfort BASELINE
HUMV	TAVR	0	82	160	1	0	2	2	0	0	1	0	0	0	0	1	0	0	0	0	0	0	0	0	1	0	0	0	4	2	14.7	80	60	3	60	45	75	78	60	40	100	0	64	75	70	2	1	2	1
HUMV	TAVR	0	58	153	2	1	1	0	1	2	0	0	0	0	0	0	0	0	0	0	0	0	1	1	0	0	0	0	4	2	14.1	90	60	2	27	5	100	10	25	20	23	0	32	25	50	3	3	2	3
HUMV	TAVR	1	75	150	3	0	2	0	0	0	0	0	0	0	0	0	0	0	0	0	0	0	0	0	0	0	0	0	1	2	13.6	55	60	3	33	20	0	45	65	40	23	0	80	25	70	1	1	1	2
HUMV	TAVR	1	72	158	3	0	2	0	1	0	1	0	0	0	0	1	0	0	0	0	0	0	0	0	0	0	0	0	1	2	10.4	79	60	2	54	40	0	100	80	65	100	30	64	0	80	1	1	1	1
HUMV	TAVR	1	90.6	160	3	0	2	0	0	0	1	0	0	0	0	0	0	0	0	0	0	0	0	0	0	1	0	0	1	2	11.8	39	60	2	29	20	0	33	60	20	35	33	60	0	80	2	2	2	2
HUMV	TAVR	1	75.6	149	3	1	2	0	1	0	0	0	0	0	0	0	0	0	0	0	0	0	1	1	0	0	0	0	1	2	10.8	63	60	2	83	40	100	90	80	90	100	100	100	50	60	1	1	2	2
HUMV	TAVR	1	79	158	3	1	2	0	1	0	1	0	0	0	0	0	0	0	0	0	0	0	0	0	0	0	0	0	3	2	8.9	73	60	2	42	20	0	78	45	40	65	0	76	50	70	2	2	2	2
HUMV	TAVR	0	74.7	159	3	2	2	0	1	0	1	1	0	0	0	1	0	0	0	0	0	0	1	1	0	0	0	0	3	2	13.7	45	45	2	40	35	0	100	35	35	53	0	76	25	60	2	2	3	1
HUMV	TAVR	1	81.5	154	1	1	2	0	1	0	1	0	0	0	0	0	0	0	0	0	0	0	0	1	0	1	0	0	1	3	11.4	42	60	3	21	25	0	45	30	0	23	0	56	0	50	2	2	3	2
HUMV	TAVR	0	70	163	3	2	2	2	1	0	1	0	0	1	1	1	1	0	0	0	0	0	0	0	0	1	0	0	4	3	14.1	64	60	3	63	35	75	20	45	50	100	100	92	50	60	2	1	2	2
HUMV	TAVR	0	82	155	3	1	2	2	0	0	0	0	0	0	0	0	0	0	0	0	0	0	1	1	0	0	0	0	1	3	8.9	60	60	3	42	40	0	13	85	55	100	0	64	25	60	2	1	3	2
HUMV	TAVR	1	79	152	3	1	2	0	1	3	1	0	0	0	1	1	0	0	0	0	0	0	0	0	0	1	0	0	2	2	12.5	50	60	2	53	30	100	90	45	30	68	0	40	75	80	2	2	2	1
HUMV	TAVR	0	71	163	1	1	2	2	1	3	1	0	0	0	0	0	0	0	0	0	0	0	1	1	1	1	0	0	1	3	12.1	49	60	2	33	5	0	0	20	0	13	100	48	100	50	2	1	3	2
HUMV	TAVR	1	61	153	3	2	2	2	0	0	1	0	0	0	0	0	0	0	0	0	0	0	0	0	1	0	0	0	1	2	11.3	80	60	2	22	0	0	40	55	40	0	0	64	0	40	3	3	3	2
HUMV	TAVR	0	78	158	3	1	2	0	1	2	0	0	0	0	0	0	0	0	0	0	0	0	1	1	0	0	0	1	1	2	11.3	58	60	2	58	30	50	80	60	60	88	33	96	25	50	2	1	1	1
HUMV	TAVR	1	83.5	163	3	1	1	2	1	0	0	0	0	0	0	0	0	0	0	0	0	0	0	0	0	0	0	0	1	2	13.1	67	65	2	27	20	0	23	50	30	35	0	64	25	60	2	2	2	3
HUMV	TAVR	0	94	172	1	1	2	2	0	0	0	0	0	0	0	0	0	0	0	0	0	0	1	1	0	0	0	0	1	2	13.6	46	35	2	69	40	0	100	80	80	100	100	100	25	90	1	1	1	1
HUMV	TAVR	0	70	160	1	1	2	2	1	1	1	0	0	0	0	1	0	0	0	0	0	0	0	0	0	1	0	0	4	2	10.6	66	55	2	26	10	0	55	35	50	43	0	44	25	20	2	2	2	2
HUMV	TAVR	1	45	160	3	1	3	0	0	2	0	0	0	0	0	0	0	0	0	0	0	0	1	1	1	0	1	0	4	2	10.9	84	55	2	38	0	0	100	65	50	23	0	100	0	20	3	2	2	1
HUMV	TAVR	0	87	161	1	1	1	2	1	0	0	0	0	0	0	0	0	0	0	0	1	0	0	0	0	0	0	0	1	3	11.5	47	60	3	28	30	0	68	35	10	23	0	84	0	50	1	2	1	2
HUMV	TAVR	1	66	142	3	1	2	0	1	2	1	0	0	0	0	0	0	0	0	0	0	0	0	0	0	1	1	0	2	2	11.3	48	60	1	41	55	75	58	65	20	55	0	20	25	80	2	2	2	2
HUMV	TAVR	1	75.6	160	2	1	2	0	1	0	1	0	0	0	0	1	0	0	0	0	0	0	0	0	0	1	0	0	2	2	11.6	51	60	2	42	30	0	80	75	25	100	0	68	0	50	1	1	1	1
HUMV	TAVR	1	65.6	151	1	1	2	0	0	0	0	0	1	0	0	0	0	0	0	0	0	0	0	0	0	0	0	0	1	2	8.8	72	45	2	62	55	0	100	55	70	90	100	88	0	55	1	1	1	1
HUMV	TAVR	1	51	154	3	1	3	0	0	0	1	0	1	0	0	0	0	0	0	0	0	0	0	0	0	0	0	0	2	2	11.8	62	50	2	65	60	0	80	70	75	90	100	84	25	60	1	1	1	1
HUMV	TAVR	0	86	173	1	1	2	2	1	2	1	0	0	0	0	0	0	0	0	0	0	0	1	1	1	0	0	0	1	2	13.2	54	55	2	32	25	0	33	25	20	23	0	80	50	45	1	1	1	2
HUMV	TAVR	1	83	156	3	0	2	0	1	2	1	0	0	0	0	0	0	0	0	0	0	0	1	1	0	1	0	0	4	2	10.7	76	55	2	16.44	45	0	20	55	0	0	0	28	0	70	2	1	1	2
HUMV	TAVR	1	85	164	1	1	1	0	1	0	1	0	0	0	0	0	0	0	0	0	0	0	1	0	0	0	0	0	3	2	11.4	65	65	3	31.61	30	0	70	40	30	12.5	0	52	50	50	2	1	1	3
HUMV	TAVR	0	62	156	2	1	1	0	0	0	1	0	0	0	0	0	0	0	0	0	0	0	0	0	1	0	0	0	1	2	14.6	77	65	1	37	40	0	90	85	5	60	0	28	25	60	1	1	1	1
HUMV	TAVR	1	64	150	3	0	2	0	1	0	1	0	0	0	0	0	0	0	0	0	1	0	0	0	0	0	0	0	1	4	14.2	47	35	4	34.44	20	0	100	50	50	25	0	40	25	30	1	1	1	1
HUMV	TAVR	0	61	166	1	1	2	2	1	0	1	0	0	1	0	1	0	0	0	1	0	0	0	0	1	0	0	0	1	3	11.4	52	50	4	68.72	45	100	80	25	45	67.5	100	56	100	80	1	1	1	1
HUMV	TAVR	1	54	152	3	1	3	0	1	0	1	0	0	0	0	1	0	1	0	0	0	0	0	0	0	0	0	0	1	3	10.8	58	45	3	25.44	15	0	80	25	10	0	0	24	75	60	2	1	2	2
HUMV	TAVR	0	68	165	2	1	1	2	1	3	1	0	0	0	0	0	0	0	0	0	0	0	0	0	1	0	0	0	1	3	14.4	79	35	3	49.12	35	0	100	65	45	42.5	66.66	88	0	55	1	1	2	1
HUMV	TAVR	0	77	168	1	1	2	0	0	0	0	0	0	0	0	0	0	0	0	0	0	0	0	0	0	0	0	0	4	3	9.2	58	35	3	45.66	25	0	0	55	55	100	100	76	0	60	2	1	2	3
HUMV	TAVR	1	64	156	1	1	4	0	1	0	0	0	0	0	0	0	0	0	0	0	0	0	1	1	0	0	0	0	1	1	10.5	82	60	1	50.25	45	0	100	80	25	100	33.33	44	25	90	2	1	2	1
HUMV	TAVR	1	42.5	146	3	1	1	0	1	0	1	0	0	0	0	1	0	0	0	0	0	0	1	0	0	0	0	0	1	1	11.6	33	45	1	23.72	15	0	45	25	15	77.5	0	36	0	30	2	1	2	2
HUMV	TAVR	0	64	165	1	1	4	0	1	0	0	0	0	0	0	0	0	0	0	0	0	0	1	1	1	0	0	0	1	3	9.6	64	50	3	13.5	10	0	45	50	0	12.5	0	4	0	10	2	1	2	2
HUMV	TAVR	0	76	159	1	1	3	0	1	0	1	0	0	1	1	1	0	0	0	0	0	0	0	0	0	0	0	0	1	3	15.8	38	35	3	33.22	15	0	100	60	25	10	0	64	25	45	1	1	1	1
HUMV	TAVR	0	70	176	1	1	4	2	1	0	1	0	0	0	0	0	0	0	0	0	0	0	1	1	1	0	0	0	1	2	11.6	31	60	2	59.38	35	0	100	85	65	77.5	100	72	0	40	1	1	1	1
HUMV	TAVR	0	87	156	1	1	2	0	0	0	1	0	0	1	0	0	0	0	0	0	0	0	1	1	1	0	0	0	1	2	13	70	55	2	55.61	25	25	100	60	55	22.5	100	88	25	50	1	1	1	1
HUMV	TAVR	0	85	166	1	1	1	0	0	3	1	0	0	0	0	0	0	0	0	0	0	0	0	0	0	0	0	0	2	3	13.7	60	45	2	14.5	15	0	22.5	20	20	0	0	28	25	30	1	1	3	3
HUMV	TAVR	0	56.6	177	1	1	3	0	0	0	1	0	0	0	0	0	0	0	0	0	0	0	0	0	0	0	0	0	4	3	11.4	59	55	2	48.46	35	0	70	50	45	52.5	66.66	92	25	40	1	1	1	2
HUMV	TAVR	0	63.2	159	1	1	2	0	0	0	0	0	0	0	0	0	0	0	0	0	1	0	0	0	0	0	0	0	4	2	15.6	74	60	2	21.6	40	0	10	45	20	42.5	0	36	0	40	1	1	1	3
HUMV	TAVR	0	79	173	1	1	4	0	0	3	1	0	0	0	0	1	0	0	0	0	0	0	0	0	0	0	0	0	1	3	13.6	56	50	2	39.5	50	0	45	45	60	42.5	0	88	25	50	1	1	1	2
HUMV	TAVR	1	65	160	1	1	2	0	1	0	1	0	0	0	0	0	0	0	0	0	0	0	0	0	0	0	0	0	3	4	13.9	45	50	4	43	5	0	80	70	30	87	0	88	25	60	2	1	2	1
HUMV	TAVR	0	70	155	3	0	1	0	0	0	1	0	0	0	0	1	0	0	0	0	0	0	0	0	0	0	0	0	1	4	9.3	44	60	4	59	65	0	67	65	85	90	67	68	25	100	2	1	1	2
HUMV	TAVR	0	82	179	1	1	4	0	1	0	0	0	0	0	0	0	0	0	0	1	0	0	1	1	0	0	0	0	1	4	9.4	79	50	4	28	25	0	100	80	15	12	0	16	0	45	1	1	2	1
HUMV	TAVR	1	87	160	4	1	1	0	1	0	1	0	0	0	0	0	0	0	0	0	0	0	0	0	0	0	0	0	1	3	12.4	71	60	3	49	70	25	10	85	40	90	33	60	25	50	1	1	1	3
HUMV	TAVR	0	67.1	160	3	1	1	1	1	3	1	0	0	0	0	1	0	0	0	0	0	0	1	0	0	0	0	0	1	4	13.9	58	50	4	23	25	0	70	55	10	12	0	36	0	50	1	2	3	2
HUMV	TAVR	1	73	157	1	1	2	0	1	0	1	0	0	0	0	0	0	0	0	0	0	0	0	0	0	1	0	0	1	4	9.6	43	70	4	5.3	5	0	10	0	0	0	0	8	25	10	2	2	3	3
HUMV	TAVR	1	73.8	149	1	1	1	0	1	0	0	0	0	0	0	1	0	0	0	0	0	0	0	0	0	0	0	0	1	4	11.7	48	60	4	14	10	0	32	45	15	0	0	16	0	40	1	1	1	2
HUMV	TAVR	0	90.6	172	1	1	2	2	1	0	1	0	0	1	1	0	1	0	0	0	0	0	0	0	0	0	0	0	4	4	13.1	32	30	4	19	0	0	10	55	0	10	0	96	0	30	2	2	3	3
HUMV	TAVR	0	85	168	1	1	2	2	1	0	1	0	0	0	0	0	0	0	0	0	1	0	0	0	0	0	0	0	1	4	12.1	54	47	4	48	65	0	100	60	25	80	0	80	25	50	1	1	1	3
HUMV	TAVR	0	85.8	161	1	1	2	0	1	0	1	0	0	0	0	1	0	0	0	0	0	0	1	1	0	0	0	0	1	4	13.6	63	35	4	83	60	25	100	90	80	100	100	88	100	80	1	1	1	1
HUMV	TAVR	0	62	150	3	0	2	0	1	0	1	0	0	1	0	0	0	0	0	0	0	0	0	0	0	0	0	0	1	4	11.9	34	60	4	65	40	0	57	85	80	100	100	96	25	50	1	1	1	2
HUMV	TAVR	0	89	168	2	1	2	2	1	2	0	0	0	0	0	0	0	0	0	0	0	0	1	1	0	0	0	0	1	4	12.6	66	35	4	80	75	100	100	45	40	100	100	84	75	60	1	1	2	1
HUMV	TAVR	0	77.9	165	3	1	2	0	1	0	0	0	0	0	0	0	0	0	0	0	0	0	1	1	0	0	0	0	1	4	10	31	40	4	51	5	0	45	50	50	100	100	80	25	50	2	2	2	2
HUMV	TAVR	0	90.5	173	1	1	3	0	1	0	1	0	0	0	0	0	0	0	0	0	0	0	1	1	0	0	0	0	1	4	11	3	50	3	33	20	0	100	15	10	12	0	44	100	20	1	1	2	1
HUMV	TAVR	1	83.1	164	1	1	2	0	1	0	1	0	0	0	0	0	0	0	0	0	0	0	1	1	0	0	0	0	3	4	12.1	59	50	4	36	20	0	60	55	85	52	0	52	0	70	1	1	1	2
HUMV	TAVR	1	62.2	148	1	1	1	0	1	0	1	0	0	0	0	0	0	0	0	0	0	0	1	1	0	0	0	0	1	4	13.1	29	20	4	35	30	0	70	40	55	55	0	68	0	50	1	1	1	1
HUMV	TAVR	0	61.2	161	3	0	1	0	1	0	1	0	0	0	0	0	0	0	0	0	0	0	0	1	0	0	0	0	3	3	7.8	42	50	3	52	45	0	90	40	45	55	100	92	0	50	1	1	1	2
HUMV	TAVR	0	71.3	161	3	1	2	0	1	0	0	0	0	0	0	0	0	0	0	0	0	0	1	1	0	0	0	0	1	3	14.5	34	50	3	55	65	0	45	50	30	55	100	96	50	70	1	1	1	2
HUMV	TAVR	1	65	156	3	1	2	0	1	0	1	1	0	0	0	0	0	0	0	0	0	0	0	0	0	0	0	0	1	2	12.2	90	55	2	52	15	25	100	70	85	52.5	0	100	25	50	2	1	2	1
HUMV	TAVR	1	63.2	156	3	0	2	0	1	2	1	0	0	0	0	0	0	0	0	0	0	0	1	1	0	0	0	0	1	3	10.6	69	45	3	71	40	75	100	55	85	77.5	100	80	25	60	1	1	1	1
HUMV	TAVR	1	77	153	3	0	2	0	1	0	0	0	0	0	0	0	0	0	0	0	0	0	1	1	0	0	0	0	1	3	10.2	90	55	3	11	5	0	20	35	5	10	0	20	0	0	2	2	2	3
HUMV	TAVR	0	69	160	1	2	2	2	1	2	1	0	0	1	1	1	0	0	0	0	0	0	0	0	0	0	0	0	1	3	13	90	15	3	32	65	0	100	35	23	35	0	28	0	40	1	1	2	1
HUMV	TAVR	0	64	170	3	0	2	0	1	0	1	1	0	0	1	1	0	0	0	0	0	0	1	1	0	0	0	0	1	3	13.1	64	50	3	21	30	0	0	35	50	0	0	28	50	50	2	2	2	2
HUMV	TAVR	0	85	167	3	1	2	0	1	0	1	0	0	1	0	0	0	0	0	0	0	0	1	1	0	0	0	0	1	3	12.7	82	60	3	22	5	0	67	35	25	12	0	24	25	70	2	2	2	2
HUMV	TAVR	1	73	153	1	1	1	0	1	2	1	1	0	0	0	1	0	0	0	0	0	0	0	0	0	0	0	0	1	3	11.3	78	50	3	24	15	0	32	50	35	22	0	36	25	50	2	2	2	2
HUMV	TAVR	0	80	167	3	0	2	0	1	2	0	0	0	0	1	1	0	0	0	0	0	0	0	0	0	0	0	0	4	3	11.4	60	60	2	78	5	50	100	75	100	100	100	96	75	80	2	1	1	1
HUMV	TAVR	0	83	168	3	2	2	0	1	0	1	0	0	0	0	0	0	0	0	0	0	0	1	1	0	0	0	0	1	2	14.4	70	50	2	78	90	100	100	75	45	100	100	68	25	75	1	1	1	2
HUMV	TAVR	0	85	161	2	0	1	0	0	0	0	0	0	0	0	1	0	0	0	0	0	0	1	1	1	0	0	0	4	4	11.9	60	50	4	74	80	100	100	45	55	100	100	88	0	40	1	1	1	1
HUMV	TAVR	1	58	144	1	1	3	0	1	0	0	0	0	0	0	0	0	0	0	0	0	0	1	1	0	0	0	0	4	4	12.8	51	60	4	19	20	0	22	2	0	100	0	0	25	10	2	3	3	2
HUMV	TAVR	1	50	154	3	1	1	0	0	0	0	0	0	0	0	0	0	0	0	0	0	0	0	1	0	0	0	0	1	3	9.3	43	60	3	53	0	100	10	75	15	100	100	32	50	50	2	3	3	3
HUMV	TAVR	0	73	167	1	1	1	2	0	0	1	0	0	0	0	1	0	0	0	0	1	0	0	0	0	0	0	0	4	3	10.8	87	35	3	58	55	0	90	55	35	100	100	40	50	60	1	1	2	1
HUMV	TAVR	0	78	165	3	0	2	0	1	0	1	0	0	0	0	0	0	0	0	0	0	0	0	0	0	0	0	0	1	2	12.3	61	40	2	54	70	0	90	70	75	90	0	68	25	70	2	1	2	1
HUMV	TAVR	1	64	152	3	1	1	0	0	0	0	0	0	0	0	0	0	0	0	0	0	0	0	0	0	0	0	0	4	3	13.7	70	60	3	21	25	0	10	30	30	25	0	44	25	60	2	2	3	2
HUMV	TAVR	0	73.4	161	3	0	2	2	1	2	0	0	0	0	0	1	0	0	0	0	0	0	0	0	0	0	0	0	1	3	13.5	63	60	3	76	70	100	80	70	50	100	100	92	25	50	1	1	1	1
HUMV	TAVR	1	79	167	1	1	1	0	0	0	0	0	0	0	0	0	0	1	0	0	0	0	1	1	0	0	0	0	1	4	10.5	33	50	4	28	10	0	100	45	20	12	0	36	25	20	2	3	3	1
HUMV	TAVR	0	95	175	3	2	1	2	1	2	1	0	0	0	0	0	0	0	0	0	0	0	1	1	0	0	0	0	1	3	12.5	69	55	3	36	35	0	100	55	50	12	0	24	50	50	2	1	1	1
HUMV	TAVR	1	48	148	3	1	2	0	1	0	0	0	0	0	0	0	0	0	0	0	0	0	1	1	0	0	0	0	1	3	10.1	61	50	3	39	60	0	100	70	20	62.5	0	20	25	70	1	1	1	1
HUMV	TAVR	0	78	168	1	1	1	2	1	0	1	0	0	0	0	0	0	0	0	0	0	0	0	0	0	0	0	0	1	2	13.7	64	60	2	82	55	100	100	75	100	100	100	88	25	50	1	1	1	1
HUMV	TAVR	1	55	150	3	1	1	0	0	0	1	0	0	0	0	0	0	0	0	0	1	0	1	1	0	0	0	0	1	3	12.2	55	50	2	67	70	100	22.5	70	70	100	100	52	25	50	1	1	1	1
HUMV	TAVR	0	85	163	1	1	1	0	1	1	1	0	1	0	1	1	0	0	0	0	0	0	0	0	1	0	0	0	1	3	12	67	45	3	36	50	0	100	65	15	22.5	0	48	25	70	1	1	1	1
HUMV	TAVR	0	85	168	4	1	2	0	2	3	0	0	0	0	0	0	0	0	0	0	0	0	0	0	0	0	0	0	2	3	12.9	78	55	3	62	50	100	22.5	35	40	100	100	88	25	50	1	1	1	2
HUMV	TAVR	0	136	178	1	1	3	0	1	3	1	0	0	0	1	1	0	0	0	0	0	0	0	1	0	1	0	1	1	3	13.4	54	40	3	74	60	100	32.5	55	75	100	100	96	50	70	1	2	1	2
HUMV	TAVR	0	97	162	1	1	1	2	0	0	0	0	0	0	0	0	0	0	0	0	0	0	0	0	0	0	0	0	2	2	9.4	77	50	2	54	30	0	0	80	60	100	96	96	25	50	1	1	2	3
HUMV	TAVR	0	57	169	1	1	4	0	1	2	1	0	0	0	1	1	0	0	0	0	0	0	1	1	1	0	0	0	1	2	9.7	52	35	1	60	80	0	100	60	10	100	100	68	25	50	1	1	2	1
HUMV	TAVR	1	61	153	1	0	1	0	0	0	0	0	0	0	0	0	0	1	0	0	0	0	0	0	0	1	0	0	1	3	10.8	87	35	1	58	55	100	0	50	50	50	100	100	25	70	1	1	1	3
HUMV	TAVR	1	72	148	3	1	1	2	1	0	0	0	0	0	0	0	0	0	0	0	0	0	0	0	0	0	0	0	1	2	11.6	48	55	2	34	0	0	10	20	60	50	100	44	25	80	2	3	3	2
HUMV	TAVR	1	70	145	1	1	4	0	1	0	1	0	0	0	0	1	0	0	0	0	0	0	1	1	0	0	0	0	1	2	12.8	36	30	2	37	10	100	100	45	30	0	0	52	0	20	2	3	2	1
HUMV	TAVR	1	70	145	3	1	1	0	1	2	0	0	0	0	0	0	0	0	0	0	0	0	0	0	0	0	0	0	1	2	12.5	80	55	2	63	75	0	87.5	70	85	0	100	100	50	80	1	1	1	2
HUMV	TAVR	1	72	158	1	1	1	0	1	0	0	0	0	0	0	0	0	0	0	0	0	0	1	1	0	0	0	0	1	2	14.1	60	40	2	70	25	100	80	75	55	100	100	76	25	50	1	1	1	2
HUMV	TAVR	1	93	175	1	1	1	0	1	2	1	0	0	0	0	0	0	1	0	0	0	0	1	1	0	0	0	0	1	2	10.1	80	50	2	22	5	0	100	50	0	0	0	20	25	40	2	3	3	1
HUMV	TAVR	0	85	176	1	1	1	2	1	3	1	0	0	0	0	0	0	0	0	0	0	0	1	1	0	0	0	0	1	2	13.4	59	60	3	73	25	100	70	80	35	100	100	72	75	65	1	1	2	1
HUMV	TAVR	1	76	168	3	1	2	0	1	2	0	0	0	0	0	0	0	0	0	0	0	0	0	0	0	0	0	0	1	2	13	35	60	2	51	35	100	22.5	30	70	0	100	60	50	40	2	1	3	3
HUMV	TAVR	0	90	172	1	1	2	0	0	0	1	0	0	0	0	1	0	0	0	1	0	0	1	1	0	0	0	0	4	2	12.1	84	55	2	74	65	100	22.5	80	75	100	100	100	25	50	1	1	1	3
HUMV	TAVR	1	58	160	3	1	4	2	1	0	1	0	0	0	1	1	0	0	0	0	0	0	1	1	0	1	0	0	1	2	14.5	34	45	2	34	20	0	22.5	30	25	100	0	60	50	50	1	1	3	3
HUMV	TAVR	1	43	149	3	1	2	0	1	0	1	0	0	0	0	0	0	0	0	0	0	0	0	0	0	0	0	1	1	3	14.2	90	60	3	45.92	30	100	100	35	0	0	33.33	40	75	50	1	1	3	1
HUMV	TAVR	1	67	160	1	1	1	0	1	0	1	0	0	0	0	1	0	0	0	0	0	0	0	0	0	0	0	0	2	2	11.7	75	55	2	51.33	45	0	40	50	10	100	100	92	25	40	1	1	1	3
HUMV	TAVR	1	70	160	3	1	1	0	1	0	1	0	0	0	0	1	0	0	0	0	0	0	0	0	0	0	0	0	1	3	11.8	90	60	3	50.5	60	100	22.5	70	5	100	0	72	25	60	1	1	2	3
HUMV	TAVR	0	97	176	1	1	1	2	0	2	1	0	0	0	0	0	0	0	0	0	0	0	0	0	0	0	0	0	1	2	13.4	20	60	2	74.72	40	100	35.5	70	80	100	100	100	50	50	1	1	2	2
HUMV	TAVR	1	63	150	3	1	3	2	1	1	1	0	0	0	0	0	0	0	0	0	0	0	0	0	1	0	0	0	4	2	11.6	51	60	2	55.1	35	50	22.5	50	50	87.5	70	76	25	50	1	1	2	1
HUMV	TAVR	1	64	151	3	1	3	0	0	0	0	0	0	0	0	0	0	0	0	0	0	0	0	0	0	0	0	0	4	2	14.7	66	60	2	59.33	50	100	80	50	30	55	100	44	25	60	1	1	1	1
HUMV	TAVR	0	70	163	1	1	3	2	1	0	0	0	0	0	0	1	0	0	0	0	1	0	0	0	0	0	0	0	4	1	14	48	60	1	87.22	90	100	100	65	80	100	100	100	50	90	1	1	1	1
HUMV	TAVR	1	97	155	3	0	2	0	1	1	1	0	0	0	0	0	0	0	0	0	0	0	1	1	0	1	0	0	4	2	11.2	40	60	2	51.29	30	0	77.5	80	25	77.5	66.6	80	25	60	1	1	1	1
HUMV	TAVR	1	84	154	3	1	1	0	1	2	1	0	0	0	0	0	0	0	0	0	0	0	1	1	0	0	0	0	1	2	13.3	43	60	2	38.27	20	0	42.5	60	55	90	0	52	25	50	2	2	2	2
HUMV	TAVR	0	85	160	1	1	1	2	1	2	1	0	0	0	1	1	0	0	0	0	0	0	1	1	0	1	0	0	4	3	10	57	60	3	26.66	40	0	45	40	50	0	0	40	25	40	1	1	3	1
HUMV	TAVR	1	61	142	1	1	2	0	1	0	1	0	0	0	0	0	0	0	0	0	0	0	0	0	0	0	0	0	1	2	10.9	90	60	2	75.66	60	100	100	65	35	100	100	96	25	60	2	1	1	1
HUMV	TAVR	1	56	166	1	1	1	0	0	0	1	0	0	0	1	1	0	0	0	0	0	0	0	0	0	0	0	0	4	2	12.6	84	60	2	87.22	95	100	80	80	80	100	100	100	50	70	1	1	1	1
HUMV	TAVR	0	104	182	3	0	1	0	1	0	1	0	0	0	0	0	0	0	0	0	0	0	1	1	0	0	0	1	3	1	10.8	62	60	2	40.27	15	0	32.5	35	15	100	100	40	25	50	2	1	3	2
HUMV	TAVR	1	52	147	1	1	2	0	0	0	1	0	0	0	0	0	0	0	0	0	0	0	0	0	0	0	0	0	4	2	14	80	60	2	75.77	50	100	55	70	65	100	100	92	50	70	1	1	1	1
HUMV	TAVR	0	88	170	3	1	1	0	1	0	1	0	0	0	0	1	0	0	0	0	0	0	1	1	1	0	0	1	4	3	14.8	38	60	3	63.33	55	100	100	65	70	100	0	32	75	70	1	1	2	1
HUMV	TAVR	0	85	169	2	1	2	2	1	1	1	0	0	0	0	0	0	0	0	0	0	0	1	1	0	0	0	1	1	3	12.2	80	25	2	52.11	55	0	67.5	35	35	87.5	100	64	25	50	1	1	2	2
HUMV	SAVR	0	60	159	1	1	2	0	0	0	1	0	0	0	0	0	0	0	0	0	0	0	0	0	0	0	0	0	2	2	13.7	58	60	2	58.88	25	0	100	55	0	100	100	100	50	70	2	1	3	1
HUMV	SAVR	1	69.1	155	1	1	1	0	0	0	1	0	0	0	0	0	0	0	0	0	0	0	0	0	0	0	0	0	1	2	11.1	81	65	2	71.77	70	25	100	65	85	80	100	96	25	50	1	1	2	1
HUMV	SAVR	0	72.7	157	1	1	2	0	1	3	1	0	0	1	0	0	0	0	0	0	0	0	0	0	0	0	0	0	4	3	12	60	60	3	71.94	60	100	22.5	85	75	80	100	100	25	50	1	1	2	3
HUMV	SAVR	1	72	157	1	1	2	0	0	0	1	0	0	0	0	0	0	0	0	0	0	0	0	0	0	0	0	0	1	2	13.3	77	65	3	55.16	30	0	57.5	85	45	90	100	64	25	80	1	1	1	2
HUMV	SAVR	1	61	148	3	0	1	0	1	0	0	0	0	0	0	0	0	1	0	0	0	0	1	1	0	0	0	0	1	3	11	71	60	3	52.7	40	50	100	85	50	35	33.33	56	25	80	1	1	1	1
HUMV	SAVR	1	72	146	3	1	2	0	1	2	1	0	0	0	0	0	0	0	0	0	0	0	0	0	0	0	0	0	1	3	11.8	54	45	3	28.88	20	0	67.5	60	10	22.5	0	80	0	50	1	1	1	2
HUMV	SAVR	0	75.7	168	1	1	2	2	1	0	1	0	0	1	1	1	0	0	0	0	0	0	1	0	1	0	0	0	4	4	11	55	45	4	39.72	35	0	55	35	30	22.5	0	80	100	40	1	1	1	2
HUMV	SAVR	1	53	165	4	0	1	0	1	0	1	0	0	0	0	0	0	0	0	0	1	0	0	0	0	1	0	0	4	3	11.9	84	40	3	31.74	20	0	22.5	65	25	22.5	66.66	64	0	60	1	1	2	1
HUMV	SAVR	1	77.6	159	1	1	1	0	1	2	1	0	0	0	0	0	0	0	0	0	0	0	0	0	0	0	0	0	4	3	10.4	51	65	3	52.44	40	0	80	55	65	55	100	52	25	60	2	1	2	1
HUMV	SAVR	0	68.5	156	1	1	1	0	1	0	0	0	0	0	0	0	0	0	0	0	0	0	0	0	0	0	0	0	4	4	11.6	87	40	3	49.83	15	0	52.5	85	50	100	0	96	50	50	2	3	3	3
HUMV	SAVR	0	72	161	3	0	2	1	0	0	1	0	0	0	0	0	0	0	0	0	0	0	0	0	0	0	0	1	1	2	9.7	84	25	2	72.18	70	100	100	90	75	50	66.66	48	50	80	2	1	1	1
HUMV	SAVR	0	91.1	166	1	1	3	2	0	0	1	0	0	0	0	0	0	0	0	0	0	0	0	0	0	0	0	0	1	1	13.6	67	65	1	87.77	100	100	80	85	100	100	100	100	25	75	1	1	1	1
HUMV	SAVR	1	77.8	146	3	1	1	0	0	0	1	0	0	0	0	0	0	0	0	0	0	0	0	0	0	0	0	0	1	2	12	67	60	2	71.66	85	75	70	70	60	100	100	60	25	90	1	1	1	2
HUMV	SAVR	0	92.2	172	1	1	2	0	1	0	0	0	0	0	0	0	0	0	0	0	0	0	0	0	0	0	0	0	1	2	13.8	86	65	2	72.14	85	50	100	85	90	100	33.33	56	50	70	1	1	1	1
HUMV	SAVR	0	78.1	163	1	1	1	2	1	0	1	0	0	0	0	0	0	0	0	0	0	0	0	0	0	0	0	0	4	2	12.9	74	50	2	55	55	0	70	80	30	60	100	100	0	50	1	1	1	2
HUMV	SAVR	0	81	166	1	1	1	0	1	0	1	0	0	0	0	0	0	0	0	0	0	0	0	0	0	0	0	0	4	3	15	87	65	3	43.05	55	0	67.5	55	25	100	0	60	25	30	1	1	1	2
HUMV	SAVR	0	80.1	166	1	1	1	2	1	0	1	0	0	0	0	0	0	0	0	0	0	0	0	0	0	0	0	0	1	3	11.8	60	55	3	58.33	45	0	100	65	5	100	100	60	50	60	1	1	1	1
HUMV	SAVR	0	82	169	3	0	4	2	1	3	1	0	0	0	0	0	0	0	0	0	0	0	0	0	0	0	0	0	1	3	12.2	90	65	3	45.77	55	0	70	55	20	60	100	52	0	40	1	1	1	2
HUMV	SAVR	0	80.4	169	1	1	2	0	0	0	0	0	0	0	0	0	0	0	0	0	0	0	0	0	0	0	0	0	2	1	15.2	73	50	1	65.11	85	0	100	60	40	100	100	76	25	60	1	1	1	1
HUMV	SAVR	1	85	150	3	0	1	0	1	2	1	0	0	0	0	0	0	0	0	0	1	0	0	0	0	0	0	0	1	3	10.4	66	55	3	46.55	65	0	100	60	55	55	0	84	0	60	1	1	1	1
HUMV	SAVR	0	73.3	166	1	1	2	0	1	2	0	0	0	0	0	0	0	0	0	0	0	0	1	1	0	0	0	0	1	3	11.5	84	50	3	80.22	85	100	100	75	45	100	100	92	25	50	1	1	1	1
HUMV	SAVR	1	69.2	160	3	0	2	0	1	0	1	0	0	0	0	0	0	0	0	0	0	0	1	0	0	0	0	0	1	2	12.6	56	65	2	68.38	55	75	47.5	70	55	100	100	88	25	70	1	1	1	2
HUMV	SAVR	1	75.6	154	2	0	1	0	1	2	0	0	0	0	0	0	0	0	0	0	1	0	0	0	0	0	0	0	1	3	11.7	46	40
HUMV	SAVR	1	76	158	3	1	1	0	1	0	1	0	1	0	0	0	0	0	0	0	0	0	0	0	0	0	0	0	1	1	13.1	90	65	1	66.33	25	100	10	50	80	100	100	80	25	50	2	1	2	3
HUMV	SAVR	1	72	143	3	1	1	0	1	0	0	0	0	0	0	0	0	0	0	0	0	0	1	0	0	0	0	0	1	2	12.7	64	50	2	51.33	60	0	100	85	40	100	0	52	25	80	1	1	2	1
HUMV	SAVR	0	85.5	167	1	1	2	0	1	3	1	0	0	0	0	1	0	1	0	0	0	0	0	0	0	0	0	0	1	2	12.8	60	60	2	42.88	20	0	100	50	20	0	100	96	0	40	1	1	1	1
HUMV	SAVR	1	87	157	3	1	3	1	1	0	1	0	0	0	0	0	0	0	0	0	0	0	0	0	0	0	0	0	4	3	12.6	65	55	2	69.66	55	75	100	80	20	100	100	72	25	80	1	1	1	1
HUMV	SAVR	0	94.8	164	1	1	2	0	1	2	1	0	0	1	0	1	0	0	0	0	1	0	0	0	0	0	0	0	1	2	11	40	45	2	58.88	25	0	100	55	0	100	100	100	50	70	2	1	3	1
HUMV	SAVR	1	54.5	154	3	0	2	0	1	0	0	0	0	0	0	0	0	0	0	0	0	0	0	0	0	0	0	0	3	3	12.3	82	60	3	52.55	55	100	10	55	0	35	100	68	50	40	2	1	2	3
HUMV	SAVR	1	58.8	153	3	0	2	0	1	1	0	0	0	0	0	0	0	1	0	0	0	0	0	0	0	0	0	0	4	3	12.1	83	55	3	28.5	45	0	22.5	35	5	100	0	24	25	50	2	1	1	3
HUMV	SAVR	0	102.6	176	1	1	2	0	1	2	1	0	0	1	0	0	0	0	0	1	0	0	1	1	0	0	0	0	1	2	13.9	49	50	2	71.38	50	100	77.5	40	50	100	100	100	25	70	1	1	1	2
HUMV	SAVR	0	86	166	1	1	4	1	1	0	0	0	0	0	0	0	0	0	0	0	0	0	1	1	1	0	0	0	1	3	15	84	55	3	58.72	10	75	100	80	25	62.5	100	76	0	70	2	3	1	1
HUMV	SAVR	1	56	152	1	1	2	0	1	0	1	0	0	0	0	0	0	0	0	0	0	0	1	1	0	0	0	0	1	3	11.1	60	55	3	40.27	40	0	35	65	70	67.5	0	60	25	70	1	1	1	2
HUMV	SAVR	0	72.7	167	1	1	2	2	1	0	1	0	0	0	0	0	0	0	0	0	0	0	0	0	0	0	0	0	4	2	14.3	76	45	2	87.22	100	100	100	90	65	100	100	80	50	80	1	1	1	1
HUMV	SAVR	0	82	164	1	1	3	0	1	0	0	0	0	0	0	0	0	0	0	0	0	0	1	1	0	0	0	0	4	2	16.8	69	50	2	50	75	0	45	50	90	100	66.66	88	0	60	1	1	1	1
HUMV	SAVR	0	78.5	159	2	1	2	0	1	2	1	1	0	0	0	0	0	0	0	0	0	0	0	0	1	0	0	0	1	3	11.8	53	50	3	37.22	40	0	60	30	25	100	0	80	0	70	2	1	2	3
HUMV	SAVR	0	80	160	1	1	4	2	1	0	1	0	0	1	0	0	0	0	0	1	0	0	0	0	0	0	0	0	4	3	12.7	71	70	3	70.33	70	100	70	80	20	100	100	68	25	75	1	1	1	2
HUMV	SAVR	1	74.3	155	3	1	1	0	1	2	1	0	0	0	0	0	0	0	0	0	0	0	1	1	0	0	0	0	1	3	12	71	80	3	62.44	40	0	100	60	20	100	100	92	50	75	1	3	2	1
HUMV	SAVR	0	82	172	1	1	4	0	1	0	1	0	0	0	1	0	0	0	0	0	0	0	0	0	0	0	0	0	4	3	14.1	87	50	3	59.72	25	0	100	85	80	43	100	100	25	70	1	1	1	1
HUMV	SAVR	1	68.8	148	1	1	1	0	1	0	1	0	0	1	0	0	0	0	0	1	0	0	0	0	0	0	0	0	4	2	12.4	27	50	2	48.61	25	0	43973	70	40	100	100	80	0	30	1	1	1	3
HUMV	SAVR	1	73.1	156	3	0	2	0	1	2	1	0	0	0	1	0	0	0	0	0	0	0	0	0	0	0	0	0	4	1	13.7	37	30	1	68.88	50	100	100	70	40	100	100	44	25	50	1	1	2	1
HUMV	SAVR	1	65	165	3	1	2	0	1	2	1	0	1	0	0	0	0	0	0	0	0	0	0	0	0	0	0	0	1	1	11.2	50	55	1	83.44	85	100	100	75	65	100	100	76	50	70	1	1	1	1
HUMV	SAVR	0	70	160	1	1	3	0	1	2	1	0	0	0	1	1	0	0	0	0	0	0	1	1	0	0	0	0	1	1	13.2	76	35	1	73.33	75	0	100	70	90	100	100	100	25	60	1	1	2	1
HUMV	SAVR	1	56	148	3	0	2	0	1	0	0	0	0	0	0	0	0	0	0	0	0	0	1	1	0	0	0	0	1	1	12.4	90	80	1	77	85	100	80	75	75	100	100	28	50	80	1	1	1	1
HUMV	SAVR	0	83	175	1	1	2	1	1	0	0	0	0	0	0	0	0	0	0	0	0	0	0	0	0	0	0	0	4	3	14	84	70	3	49.77	40	100	80	55	40	100	0	8	25	50	1	1	1	2
HUMV	SAVR	0	96.9	162	1	1	2	0	1	0	1	0	0	0	0	0	0	0	0	0	0	0	0	0	0	0	0	1	4	1	13.2	84	65	1	60.22	80	0	100	45	25	100	100	92	0	50	2	1	1	1
HUMV	SAVR	0	62	153	1	1	2	0	1	2	0	0	0	1	1	1	0	0	0	0	0	0	0	0	0	0	0	1	2	1	10.6	54	65	1	21.5	10	0	20	45	20	22.5	0	76	0	50	1	1	1	2
HUMV	SAVR	1	51	147	2	1	4	0	1	0	0	0	0	0	0	0	0	0	0	0	0	0	1	1	0	0	0	0	1	2	12.1	72	50	2	66.66	65	0	70	60	55	100	100	100	5	60	1	1	1	2
HUMV	SAVR	0	61	165	1	1	4	0	0	0	0	0	0	0	0	0	0	0	0	0	0	0	0	0	0	0	0	0	1	1	12.8	68	50	1	87.33	85	100	100	85	70	100	100	96	50	50	1	1	1	1
HUMV	SAVR	0	89.5	172	1	1	3	0	1	0	0	0	0	0	0	0	0	0	0	0	0	0	0	0	0	0	0	0	3	2	15.3	63	55	2	59.22	60	0	67.5	55	50	87.5	100	88	25	70	1	1	1	1
HUMV	SAVR	1	86	155	3	0	1	0	1	1	1	0	0	0	0	0	0	0	0	0	0	0	0	0	0	0	0	0	4	2	13.8	76	77	2	47.5	50	0	32.5	65	0	100	100	80	0	50	1	1	2	2
HUMV	SAVR	0	65.8	159	1	1	2	0	1	1	0	0	0	0	0	0	0	0	0	0	0	0	0	0	0	0	0	0	4	2	13.8	85	50	2	55.33	75	0	100	85	45	0	100	68	25	60	1	1	1	1
HUMV	SAVR	0	74	160	2	1	0	0	1	0	1	0	0	0	0	0	0	0	0	0	0	0	0	0	0	0	0	0	1	3	12.3	85	20	3	35.05	5	0	32.5	55	10	100	0	88	25	30	2	2	3	2
HUMV	SAVR	0	79	165	1	1	2	0	0	0	1	0	0	0	0	0	0	0	0	0	0	0	0	0	0	0	0	1	1	2	10.5	77	65	2	84.44	50	100	100	90	95	100	100	100	25	50	1	1	1	1
HUMV	SAVR	1	73.7	157	1	0	2	0	1	1	0	0	0	0	0	0	0	0	0	0	0	0	0	0	0	0	0	0	4	3	11.5	88	60	4	14.5	10	0	22.5	65	0	0	0	8	25	50	1	3	2	3
HUMV	SAVR	0	84	171	1	1	2	0	1	2	1	0	0	0	1	1	0	0	0	0	0	0	0	0	0	0	0	0	4	3	11.6	89	60	3	45.38	60	0	45	65	50	77.5	0	36	75	50	1	1	1	2
HUMV	SAVR	1	68	158	1	1	2	0	1	0	1	0	1	0	0	0	0	0	0	0	0	0	1	0	0	1	0	0	4	2	11.2	68	55	2	48.83	70	50	57.5	45	50	90	0	52	25	60	1	1	1	1
HUMV	SAVR	1	77	152	3	0	1	0	1	0	1	0	0	0	0	0	0	0	0	0	0	0	0	0	0	0	0	0	1	2	13.3	62	50	2	78.44	55	100	100	85	45	100	100	96	25	70	1	1	1	1
HUMV	SAVR	0	77.4	161	1	1	2	0	1	0	1	0	0	0	1	1	0	0	0	0	0	0	1	1	0	0	0	0	1	2	13	55	43	2	38.83	40	0	100	40	50	67.5	0	52	0	80	1	1	1	1
HUMV	SAVR	1	71	154	1	1	2	0	1	0	0	0	0	0	0	0	0	0	0	0	0	0	0	0	0	0	0	0	2	2	12.1	64	43	2	90	75	100	100	85	100	100	100	100	50	70	1	1	1	1
HUMV	SAVR	1	78	153	1	1	2	0	1	0	1	0	0	0	1	0	0	0	0	0	0	0	0	0	0	0	0	0	1	4	11.7	61	55	4	76.33	95	100	45	80	85	90	100	92	0	70	1	1	1	2
HUMV	SAVR	1	88.8	161	3	0	2	1	1	0	0	0	0	0	1	1	0	0	0	0	0	0	0	0	0	0	0	0	4	2	12.8	85	50	2	28.38	25	25	57.5	45	10	25	0	68	0	70	1	1	2	2
HUMV	SAVR	0	68	163	1	1	1	2	0	0	0	0	0	0	0	0	0	0	0	0	0	0	0	0	0	1	0	0	1	4	14	50	48	4	45.66	60	0	100	45	25	100	0	56	25	60	1	1	3	1
HUMV	SAVR	0	76	159	1	1	2	2	1	1	1	0	0	0	1	0	0	0	0	0	0	0	0	0	0	0	0	0	4	2	13.6	48	70	2	49.33	60	0	100	55	30	10	100	64	25	60	1	1	1	1
HUMV	SAVR	0	88	171	1	1	1	0	0	0	0	0	0	0	0	0	0	0	0	0	0	0	0	0	0	0	0	0	1	1	13.1	64	50	1	82	70	100	100	85	70	100	100	88	25	75	1	1	1	1
HUMV	SAVR	1	74.1	158	1	1	2	0	0	3	0	0	0	0	0	0	0	0	0	0	0	0	0	0	0	0	0	0	1	2	12.4	71	60	2	82.77	75	100	100	80	85	100	100	80	25	60	1	1	1	1
HUMV	SAVR	0	109	180	1	1	2	0	1	0	0	0	0	0	0	0	0	0	0	0	0	0	1	0	0	0	0	0	1	2	17	55	55	2	63.44	20	0	100	65	60	100	100	76	50	50	2	1	3	1
HUMV	SAVR	0	72	168	1	1	2	2	1	0	0	0	0	0	0	0	0	0	0	0	1	0	0	0	0	0	0	0	1	2	14.1	90	50	2	82.88	95	100	100	60	85	100	100	56	50	80	1	1	1	1
HUMV	SAVR	0	75	172	3	1	2	0	0	0	1	0	0	0	0	0	0	0	0	0	0	0	0	0	0	0	0	0	1	1	14	71	50	1	88.33	65	100	100	95	85	100	100	100	50	80	1	1	1	1
HUMV	SAVR	0	77	169	1	1	1	2	1	0	1	0	0	0	0	0	0	0	0	0	0	0	0	0	0	0	0	0	1	2	13.1	68	50	2	88.66	85	100	100	85	90	100	100	88	50	80	1	1	1	1
HUMV	SAVR	0	67	167	1	1	1	0	1	0	0	0	0	0	0	0	0	0	0	0	0	0	0	0	0	0	0	0	1	2	13.3	59.97	60	2	30.72	25	0	100	65	5	12.5	0	44	25	50	1	1	3	1
HUMV	SAVR	1	60.4	148	1	1	2	0	1	2	1	0	0	0	0	0	0	0	0	0	0	0	0	0	0	0	0	0	1	2	13.3	88	35	2	86088	90	100	100	80	90	100	100	72	50	80	1	1	1	1
HUMV	SAVR	1	76.6	157	3	1	2	0	1	2	1	0	0	0	0	0	0	0	0	0	0	0	1	1	0	0	0	0	1	2	12.9	83	50	3	47.55	20	0	67.5	55	30	67.5	100	88	0	70	1	1	1	1
HUS	SAVR	0	69.5	158	1	1	4	2	1	0	0	0	0	0	0	0	0	0	0	0	0	0	0	0	0	0	0	0	3	3			50	3	63	85	0	58	65	80	60	100	92	25	75	1	1	1	2
HUS	SAVR	0	83	170	1	1	3	2	1	3	1	0	0	0	0	1	0	0	0	0	0	0	0	0	0	0	0	0	4	3	12.7	39	60	3	63	50	75	100	40	50	55	100	76	25	80	2	1	2	1
HUS	SAVR	0	105.5	170	1	1	2	2	1	3	1	0	0	0	0	0	0	0	0	0	0	0	0	0	1	0	0	0	1	3	11.6	95.24	55	3	27.72	20	0	22.5	45	10	0	0	52	100	45	2	2	3	2
HUS	SAVR	0	64	155	1	1	2	2	1	0	1	0	0	0	0	0	0	0	0	0	0	0	0	0	0	0	0	0	1	2	15	67.49	54	2	67.88	75	0	67.5	50	85	87.5	100	96	50	50	1	1	2	2
HUS	SAVR	0	70	169	1	1	2	2	1	3	1	0	0	1	0	0	0	0	0	0	0	0	0	0	0	0	0	0	4	3	9.7	55.49	60	3	37.38	30	0	100	55	20	67.5	0	64	0	30	1	1	2	1
HUS	SAVR	0	60	155	1	1	2	2	1	0	0	0	0	0	0	0	0	0	0	0	0	0	1	1	0	0	0	0	1	2	11.9	70.91	60	2	76.44	90	0	100	75	85	100	100	88	50	80	1	1	1	1
HUS	SAVR	1	78	170	3	0	3	1	1	1	0	0	0	0	1	1	0	0	0	0	0	0	0	1	0	0	0	0	1	3	12.80	65.65	50	3	40	60	0	57.5	50	40	67.5	0	60	25	40	2	1	1	2
HUS	SAVR	0	75	170	1	1	1	0	1	0	0	0	0	0	0	0	0	0	0	0	0	0	0	0	0	0	0	0	0	1		73.42	60	1	57.31	80	0	55	45	60	87.5	33.33	80	75	55	1	2	1	1
HUS	SAVR	1	66	155	1	1	1	0	1	2	1	0	0	1	0	0	0	0	0	0	0	0	0	0	0	1	0	0	1	3	13.1	90.16	60	3	32.66	45	0	57.5	45	15	42.5	0	64	25	50	2	1	2	2
HUS	SAVR	0	71	170	1	1	2	2	1	2	1	0	0	0	0	0	0	0	0	0	0	0	0	0	0	0	0	0	1	2	13.60	83.25	60	2	66.66	80	0	65	75	80	100	100	100	0	50	2	1	1	2
HUS	SAVR	0	79	167	1	1	3	2	1	0	1	0	0	0	0	0	0	0	0	0	0	0	0	0	0	0	0	0	1	3	14.80	71.27	60	3	44.72	75	0	77.5	55	55	55	0	60	25	65	1	1	1	2
HUS	SAVR	1	62	156	1	1	1	0	1	3	1	0	0	0	1	1	0	0	1	0	0	0	0	1	0	0	0	0	1	2	11.1	23.32	45	2	29.55	45	0	10	15	30	90	0	76	0	50	1	1	1	2
HUS	SAVR	0	89.2	171	1	1	2	2	1	3	0	0	0	0	0	0	0	0	0	0	0	0	1	1	0	0	0	0	1	3	15	32.97	45	3	62.05	20	0	67.5	90	60	100	100	96	25	80	2	2	2	2
HUS	SAVR	0	68	163	1	1	3	0	1	2	1	0	0	0	1	1	0	0	0	0	0	0	0	0	0	0	0	0	1	2			60	2	78.55	80	50	70	65	75	100	100	92	75	90	1	1	1	2
HUS	SAVR	0	78	168	2	0	2	0	1	0	1	0	0	0	0	0	0	0	0	0	0	0	1	1	0	0	0	0	1	3			45	3	31.44	70	0	67.5	30	20	67.5	0	28	0	40	1	1	2	2
HUS	SAVR	0	80	152	1	1	2	1	0	0	1	0	0	0	0	0	0	0	0	0	0	0	0	0	1	0	0	0	1	2	14.5	71.22	60	2	60.51	75	25	60	40	40	100	66.66	88	50	60	1	1	1	3
HUS	SAVR	0	75	168	1	1	2	0	0	0	1	0	0	0	0	0	0	1	0	0	0	0	0	0	0	0	0	0	4	2	13.60	79.94	72	2	57.05	75	0	35	35	60	87.5	100	96	25	75	1	1	1	3
HUS	SAVR	0	73	167	1	1	2	2	1	0	1	0	0	1	0	0	0	0	0	0	0	0	0	0	0	0	0	0	4	2	13.90	44.99	60	2	45.14	40	0	55	40	45	100	33.33	68	25	70	1	1	2	2
HUS	SAVR	0	89.2	162	1	1	2	2	1	1	1	0	0	0	0	0	0	0	0	0	0	0	0	0	0	0	0	0	4	2		56.55	60	2	68	65	75	57.5	70	40	87.5	100	92	25	70	2	1	1	2
HUS	SAVR	0	65	164	1	1	2	2	0	0	0	0	0	1	1	1	0	0	0	0	0	0	0	0	0	0	0	0	2	3	15.20	63.58	60	3	77.77	50	75	100	45	55	100	100	100	75	80	1	1	1	1
HUS	SAVR	1	60	150	1	1	2	0	0	0	0	0	0	0	0	0	0	0	0	0	0	0	0	0	0	0	0	0	1	2	13.6	84.78	65	2	45.38	60	0	55	55	70	87.5	0	56	25	50	1	1	1	2
HUS	SAVR	1	55	144	3	1	2	0	1	0	1	0	0	0	0	0	0	0	0	0	0	0	0	0	0	0	0	1	2	2	13.6	61.6	40	2	42	75	0	67.5	30	50	67.5	0	88	0	50	1	1	1	2
HUS	SAVR	0	71.5	161	1	1	2	0	1	0	0	0	0	0	0	0	0	0	0	0	0	0	0	0	0	0	0	0	1	3	16.2	70.14	60	3	30.72	45	0	10	30	30	67.5	0	44	50	25	2	1	2	3
HUS	SAVR	0	75	161	1	1	2	0	1	0	0	0	0	0	0	0	0	0	0	0	1	0	0	0	0	0	0	0	1	2	15.1	67.33	45	2	64	80	0	90	35	70	100	100	76	25	60	1	1	1	2
HUS	SAVR	1	70.5	157	3	1	2	0	1	0	1	0	0	0	0	0	0	0	0	0	0	0	1	1	0	0	0	0	1	2	11.5	70.3	60	2	32.27	45	0	45	70	30	67.5	0	8	25	60	2	1	1	2
HUS	SAVR	0	69	165	3	0	2	0	1	0	0	0	0	0	0	0	0	0	0	0	0	0	0	0	0	0	0	0	2	3	9.7	63.77	72	3	53.79	60	10	100	55	50	67.5	66.66	60	25	70	1	1	1	2
HUS	SAVR	0	75	168	2	0	4	0	1	1	1	0	0	0	0	0	0	0	0	0	0	0	0	0	0	0	0	0	3	2	13.6	67.02	56	2	59.53	90	25	100	50	55	77.5	33.33	80	25	65	1	1	1	1
HUS	SAVR	0	61.1	161	1	1	2	0	1	0	1	0	0	0	1	1	0	0	0	0	0	0	1	1	0	0	0	0	1	3		74.87	60	3	50.46	55	0	67.5	25	45	90	66.66	80	25	80	2	1	2	1
HUS	SAVR	0	80	171	1	1	1	1	0	0	1	0	0	0	0	0	0	0	0	0	0	0	0	0	0	0	0	0	1	2	15.4	67.98	60	2	63.66	75	25	80	35	55	90	100	88	25	80	1	1	1	2
HUS	SAVR	0	75.8	161	1	1	2	0	1	2	1	0	0	0	0	0	0	0	0	0	0	0	0	0	0	0	0	0	1	1		67.07	48	1	84.66	90	75	100	55	100	100	100	92	50	90	1	1	1	1
HUS	SAVR	0	72.6	162	1	0	2	0	0	0	0	0	0	0	0	0	0	0	0	0	0	0	1	1	0	0	0	0	1	2	16	78.15	66	2	61.55	95	0	57.5	45	45	77.5	100	84	50	90	1	1	1	2
HUS	SAVR	0	59	150	3	1	2	1	1	0	1	0	0	0	0	0	0	0	0	0	0	0	0	0	0	0	0	0	3	2	12.5	77.34	68	2	60.61	80	0	90	30	50	77.5	100	68	50	50	1	1	2	1
HUS	SAVR	1	68	149	3	0	2	0	0	2	1	0	0	0	0	0	0	0	0	0	0	0	0	0	0	0	0	0	1	2	12.1	85.03	64	2	27.94	25	0	67.5	30	30	55	0	44	0	50	2	1	2	2
HUS	SAVR	0	82	166	1	1	2	2	1	0	0	0	0	0	0	0	0	0	0	0	0	0	0	0	0	0	0	0	3	2	15.6	79.55	61	2	86.11	75	100	90	70	90	100	100	100	50	100	1	1	1	1
HUS	SAVR	1	60	154	2	1	4	1	0	0	0	0	0	0	0	0	0	0	0	0	0	0	0	0	1	0	0	0	1	2	13.2	79.55	64	2	60.27	70	100	67.5	40	20	55	100	40	50	60	2	1	1	2
HUS	SAVR	1	59.3	145	3	0	4	2	1	0	0	0	0	0	0	0	0	0	0	0	0	0	0	0	0	0	0	0	1	3	10.9	76.7	65	3	25.11	45	0	57.5	20	40	47.5	0	16	0	40	2	1	2	2
HUS	SAVR	0	86	166	1	1	2	2	1	1	1	0	0	1	0	0	0	0	0	0	0	0	0	0	0	0	0	0	1	2	13.9	79.32	65	2	70.05	75	50	57.5	50	70	90	100	88	50	75	1	1	1	2
HUS	SAVR	1	66.5	149	3	0	2	0	1	0	1	0	0	0	0	0	0	0	0	0	1	0	0	0	0	0	0	0	1	3	13.5	67.11	40	2	59.61	60	0	67.5	60	15	100	100	84	50	80	2	1	2	2
HUS	SAVR	1	81	169	2	1	2	0	0	0	1	0	0	0	0	0	0	0	0	0	0	0	0	0	0	0	0	0	3	1	15	63	60	1	79	85	75	80	80	60	100	100	80	50	80	1	1	2	1
HUS	SAVR	1	63.3	163	1	1	2	0	1	0	1	0	0	0	0	0	0	0	0	0	0	0	0	0	0	0	0	0	4	2	13.7	45	60	2	60	75	0	68	70	70	90	100	44	25	70	1	1	1	1
HUS	SAVR	1	81	155	1	1	2	2	1	0	1	0	0	0	0	0	0	0	0	0	0	0	0	0	0	0	0	0	4	2	11.6	68	60	2	54	60	25	45	60	50	100	33	60	50	50	2	1	1	2
[truncated: 56 more columns]
